# Supplementary material for: Active site-dominated electromagnetic enhancement of surface-enhanced Raman spectroscopy (SERS) on a Cu triangle plate
Source: Royal Society of Chemistry journal article supplement (doi:10.1039/d0ra08477h), 2020-01-01
Supplement: d0ra08477h1.pdf [file d0ra08477h1.pdf]

## Active site dominated electromagnetic enhancement of Surface enhanced Raman Spectroscopy (SERS) on Cu triangle plate

Chang Li<sup>1,2,3\*</sup>, Mingqiang Chen<sup>1,2,3</sup>

1. Analytical and testing center, Anhui University of Science & Technology, Huainan 232001, China

2. School of Chemical Engineering, Anhui University of Science and Technology, 232001, Huainan, PR China

3. School of Earth Science and Environmental Engineering, Anhui University of Science and Technology, 232001, Huainan, PR China

### S1. Vibrational frequencies and their assignments of probe molecule

Supplementary table S1 Vibrational Frequencies their assignments of Rh B and Rh 6G [s1, s2]

| Rhodamine B (Rh B)              |                                         | Rhodamine 6G (Rh 6G)            |                                         |
|---------------------------------|-----------------------------------------|---------------------------------|-----------------------------------------|
| Raman shift (cm <sup>-1</sup> ) | Assignment                              | Raman shift (cm <sup>-1</sup> ) | Assignment                              |
| 1076.1                          | C-H stretching                          | 612                             | In-plane bending motions of carbon      |
| 1198.9                          | C-C bridge band stretching and aromatic | 773                             | Out-of-plane bending motions of carbon  |
| 1281.0                          | C-H bending                             | 1183                            | Aromatic C-C bending                    |
| 1359.7                          | Aromatic C-C bending                    | 1312                            | C-C stretching vibration mode           |
| 1507.8                          | Aromatic C-C bending                    | 1360                            | Hydrogen atoms of the xanthene skeleton |
| 1527.6                          | C-H stretching                          | 1511                            | Aromatic C-C stretching vibration modes |
| 1649.4                          | Aromatic C-C stretching vibration mode  | 1650                            | Aromatic C-C stretching vibration modes |

Supplementary table S2 Vibrational Frequencies their assignments of CV and MB [s3, s4]

| Crystal violet (CV)             |                                                                  | Methylene blue (MB)             |                                              |
|---------------------------------|------------------------------------------------------------------|---------------------------------|----------------------------------------------|
| Raman shift (cm <sup>-1</sup> ) | Assignment                                                       | Raman shift (cm <sup>-1</sup> ) | Assignment                                   |
| 806                             | out-of-plane antisymmetric bending of C-phenyl                   | 669                             | C-H stretching                               |
| 914                             | Ring breathing                                                   | 1038                            | In-plane bend of C-H                         |
| 1177                            | In-plane antisymmetric stretching vibration of C-H and C- phenyl | 1070                            | C-S-C asymmetrical stretching vibration mode |

|      |                                                                  |      |                                               |
|------|------------------------------------------------------------------|------|-----------------------------------------------|
| 1370 | Antisymmetric stretching vibration of phenyl-C- phenyl           | 1153 | In-plane bend of C-H                          |
| 1520 | Phenyl ring C-C stretching and N <sup>+</sup> =phenyl stretching | 1302 | Aromatic C-C stretching vibration mode        |
| 1569 | Phenyl ring C-C stretching and bending                           | 1394 | C-N asymmetrical stretching vibration mode    |
| 1607 | Phenyl ring C-C stretching and N-phenyl stretching               | 1621 | Aromatic C-C, C-N-C stretching vibration mode |

**S2 Calculation of enhancement factor.** The EF was calculated following the formula[s5]:

$$EF = (I_{SERS}/N_{SERS})/(I_{bulk}/N_{bulk}) \quad (1)$$

$$N_{SERS} = CVN_A A_{Raman}/A_{sub} \quad (2)$$

$$N_{bulk} = \rho h N_A A_{Raman}/M \quad (3)$$

Here,  $I_{SERS}$  and  $I_{bulk}$  were the intensities of the selected Raman Peak in SERS and non-SERS spectra, and  $N_{SERS}$  and  $N_{bulk}$  were the average number of Rh. B molecules in the scattering area for SERS and non-SERS measurement. The intensities of Raman were obtained by taking average of 10 spots on one sample. The  $I_{bulk}$  as reference was got using Rh. B (0.05 M) dispersed on Si wafer at the same condition following SERS sample preparation (Supplementary Figure 1). The  $N_{SERS}$  can be estimated using equation (2) with the molar concentration of the analyte solution ( $C$ ), volume of the droplet ( $V$ ), Avogadro constant ( $N_A$ ) and the laser spot area ( $A_{Raman}$ , 1  $\mu\text{m}$  in diameter). The  $N_{bulk}$  can be calculated using equation (3). The confocal depth ( $h$ ) of the laser beam is 21  $\mu\text{m}$  and  $M$  is the molecular weight,  $\rho$  is the density of bulk Rh. B.

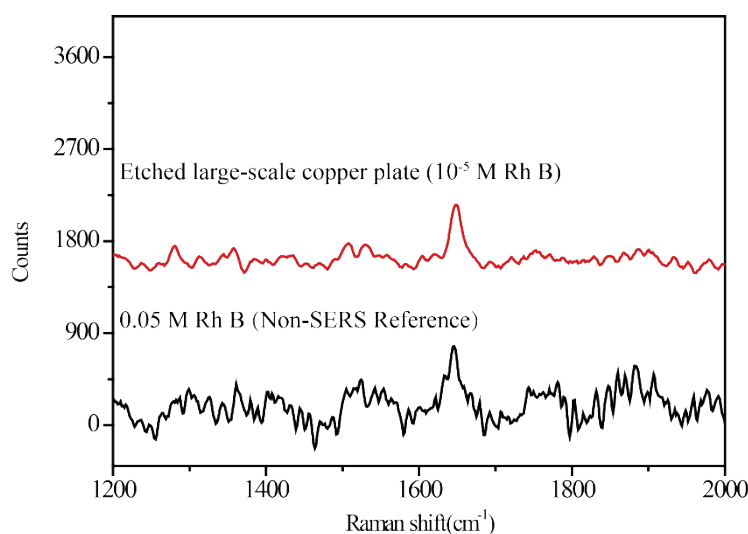

**Supplementary Figure 1 the Raman measurement of non-SERS reference and Etched large-scale copper plate. The etching time is 10 min.**

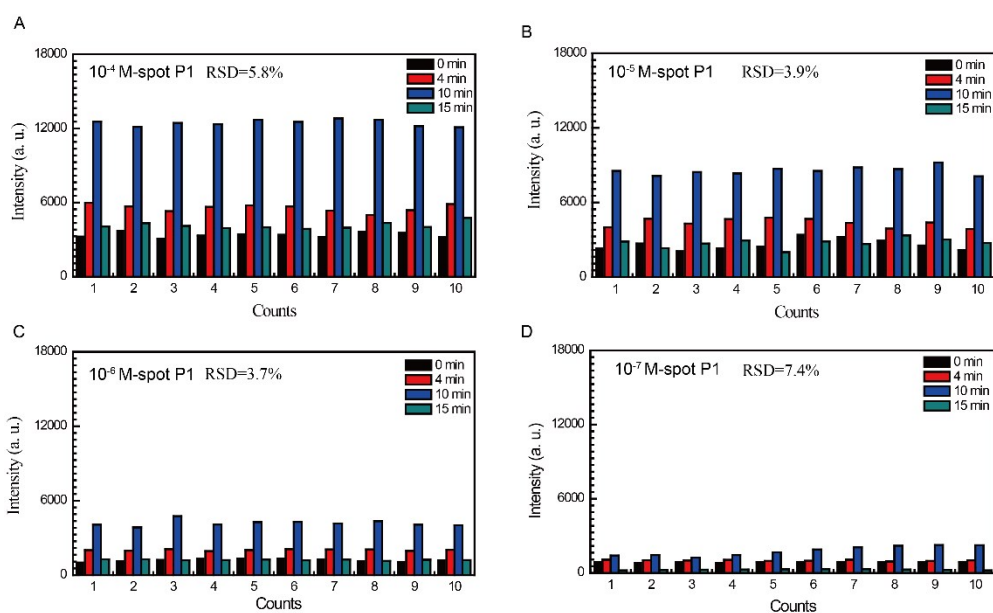

**Supplementary Figure 2** the intensities of the P1(1649  $\text{cm}^{-1}$ ) Raman vibration mode of Rh. B on CTPs. Four concentration,  $10^{-4}$ ,  $10^{-5}$ ,  $10^{-6}$ ,  $10^{-7}$  M, were selected to measure the intensities from 10 spots on 16 different substrates.

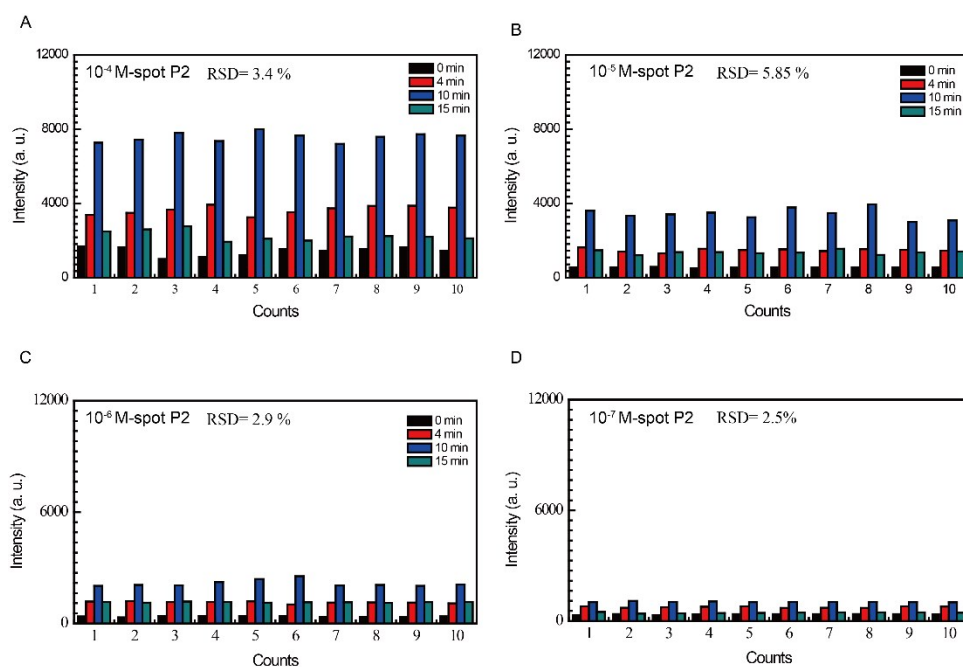

**Supplementary Figure 3** the intensities of the P2(1527  $\text{cm}^{-1}$ ) Raman vibration mode of Rh. B on CTPs. Four concentration,  $10^{-4}$ ,  $10^{-5}$ ,  $10^{-6}$ ,  $10^{-7}$  M, were selected to measure the intensities from 10 spots on 16 different substrates.

## Reference

- S1. V. Moreno, K. Murtada, M. Zougagh and A. Rios, *Spectrochimica acta. Part A, Molecular and biomolecular spectroscopy*, 2019, **223**, 117302.
- S2. Jana, S. Pande, A. K. Sinha, S. Sarkar, M. Pradhan, M. Basu, S. Saha and T. Pal, *The Journal of Physical Chemistry C*, 2009, 113, 1386-1392.
- S3. S. L. Kleinman, E. Ringe, N. Valley, K. L. Wustholz, E. Phillips, K. A. Scheidt, G. C. Schatz and R. P. Van Duyne, *J Am Chem Soc*, 2011, **133**, 4115-4122.
- S4. S. Sarkar, S. Pande, S. Jana, A. K. Sinha, M. Pradhan, M. Basu, J. Chowdhury and T. Pal, *The Journal of Physical Chemistry C*, 2008, **112**, 17862-17876.
- S5. Cong, S.; Yuan, Y.; Chen, Z.; Hou, J.; Yang, M.; Su, Y.; Zhang, Y.; Li, L.; Li, Q.; Geng, F. Noble metal-comparable SERS enhancement from semiconducting metal oxides by making oxygen vacancies. *Nature communications* **2015**, 6, 1-7.
